# Supplementary material for: Insight into CO selective chemisorption from syngas mixtures through Li2MnO3; a new H2enrichment material
Source: Royal Society of Chemistry journal article supplement (doi:10.1039/d2re00382a), 2022-10-17
Supplement: d2re00382a1.pdf [file d2re00382a1.pdf]

## Supplementary Information

### Insight into CO selective chemisorption from syngas mixtures through $\text{Li}_2\text{MnO}_3$ ; A new $\text{H}_2$ enrichment material

Carlos Hernández-Fontes<sup>a</sup>, Daniel G. Araiza<sup>a</sup>, Gabriela Díaz<sup>b</sup> and Heriberto Pfeiffer<sup>a,\*</sup>

<sup>a</sup>*Instituto de Investigaciones en Materiales, Universidad Nacional Autónoma de México. Circuito exterior s/n, Ciudad Universitaria, Del. Coyoacán, CP 04510, Ciudad de México, Mexico.*

<sup>b</sup>*Instituto de Física, Departamento de Física Química, Universidad Nacional Autónoma de México, Ciudad de México, C.P. 04510, Mexico.*

\*Corresponding author: E-mail; pfeiffer@materiales.unam.mx

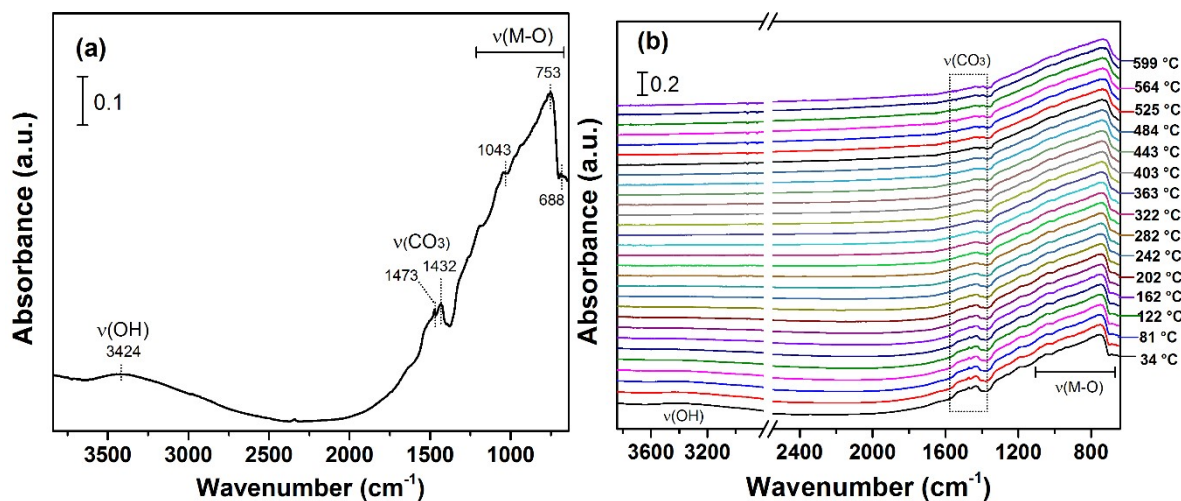

Figure S1 DRIFT spectra of the  $\text{Li}_2\text{MnO}_3$  material in an inert He flow: at room temperature (a) and as a function of the temperature (30-600 °C) (b).

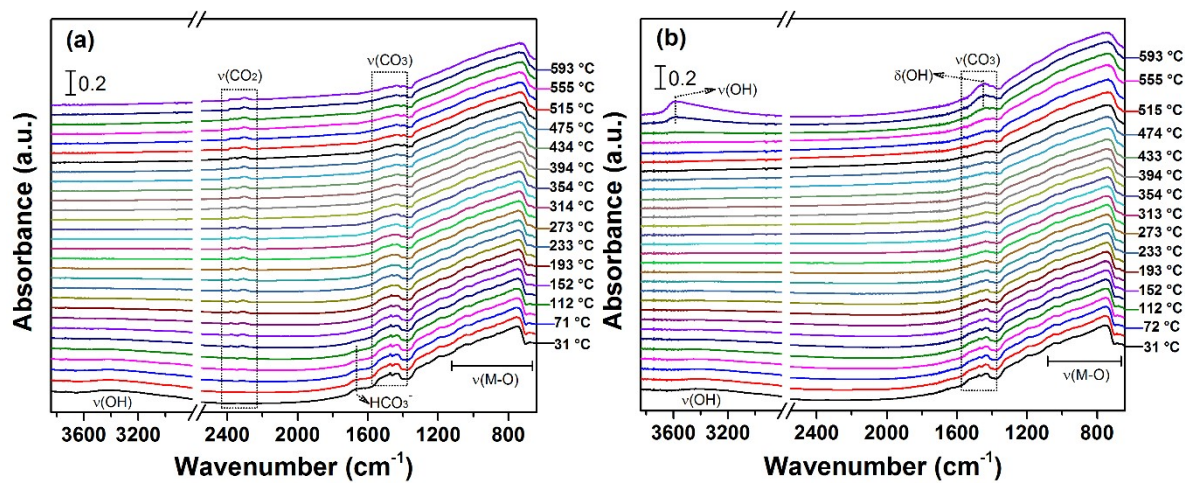

Figure S2 DRIFT spectra of the  $\text{Li}_2\text{MnO}_3$  material as a function of the temperature (30-600 °C): under  $\text{CO}_2$  (a) and  $\text{H}_2$  (b) flows.
